# Supplementary material for: Ultra-small Rh nanoparticles supported on WO3−x nanowires as efficient catalysts for visible-light-enhanced hydrogen evolution from ammonia borane
Source: Royal Society of Chemistry journal article supplement (doi:10.1039/c9na00424f), 2019-01-01
Supplement: c9na00424f1.pdf [file c9na00424f1.pdf]

## Supporting Information

# **Ultra-small Rh nanoparticles supported on WO<sub>3-x</sub> nanowires as efficient catalysts for visible-light-enhanced hydrogen evolution from ammonia borane**

*Xiao Li,<sup>a</sup> Yucong Yan,<sup>a</sup> Yi Jiang,<sup>a</sup> Xingqiao Wu,<sup>a</sup> Shi Li,<sup>a</sup> Jingbo Huang,<sup>a</sup> Junjie Li,<sup>a</sup> Yangfan Lin,<sup>a</sup> Deren Yang<sup>a</sup> and Hui Zhang<sup>a,\*</sup>*

*<sup>a</sup>State Key Laboratory of Silicon Materials, School of Materials Science and Engineering, Zhejiang University, Hangzhou, Zhejiang 310027, People's Republic of China. Email: msezhanghui@zju.edu.cn*

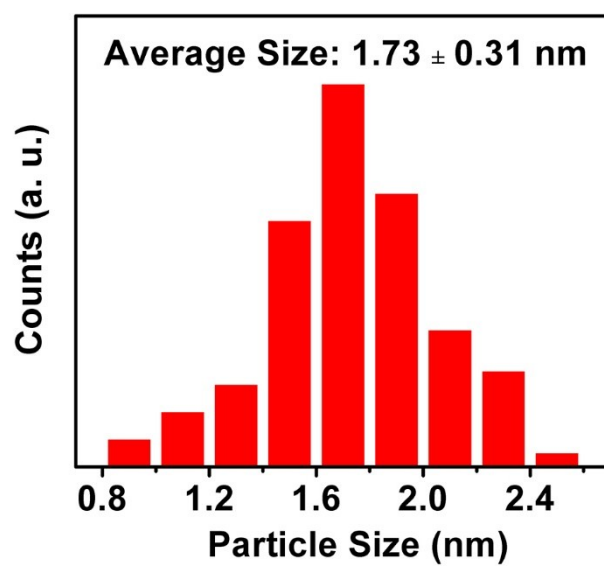

**Fig S1.** Size distribution of the Rh nanoparticles in the Rh/WO<sub>3-x</sub>-2 hybrid nanowires.

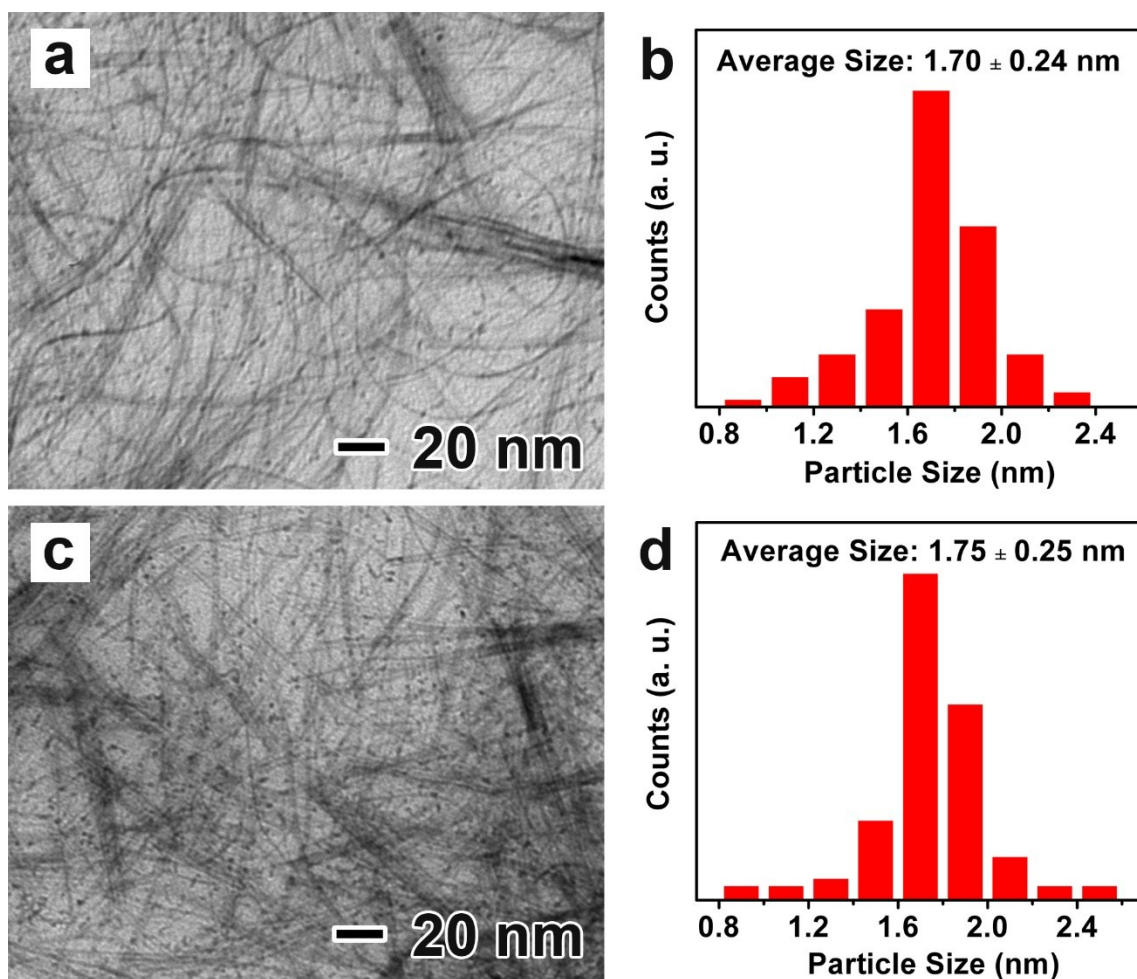

**Fig S2.** (a, c) TEM images and (b, d) corresponding size distributions for the Rh nanoparticles of Rh/WO<sub>3-x</sub>-1 and Rh/WO<sub>3-x</sub>-3 hybrid nanowires, respectively.

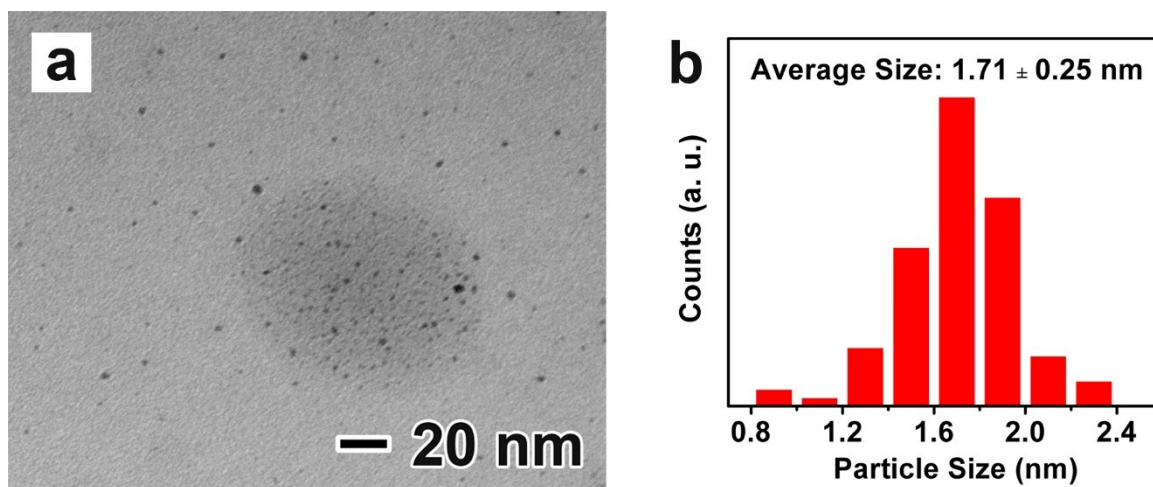

**Fig S3.** (a) TEM image and (b) corresponding size distribution of the Rh nanoparticles.

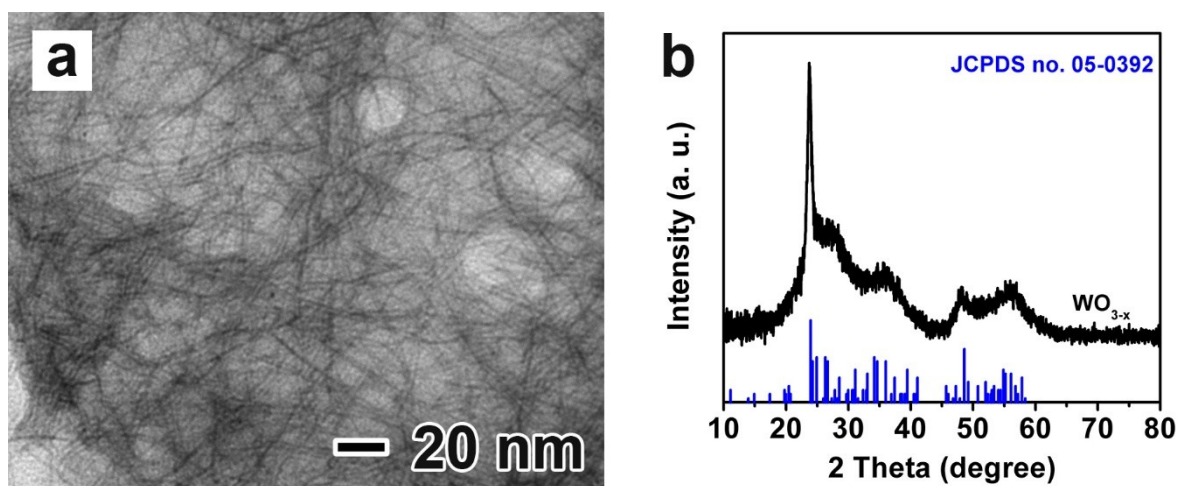

**Fig S4.** (a) TEM image and (b) XRD pattern of the  $\text{WO}_{3-x}$  nanowires.

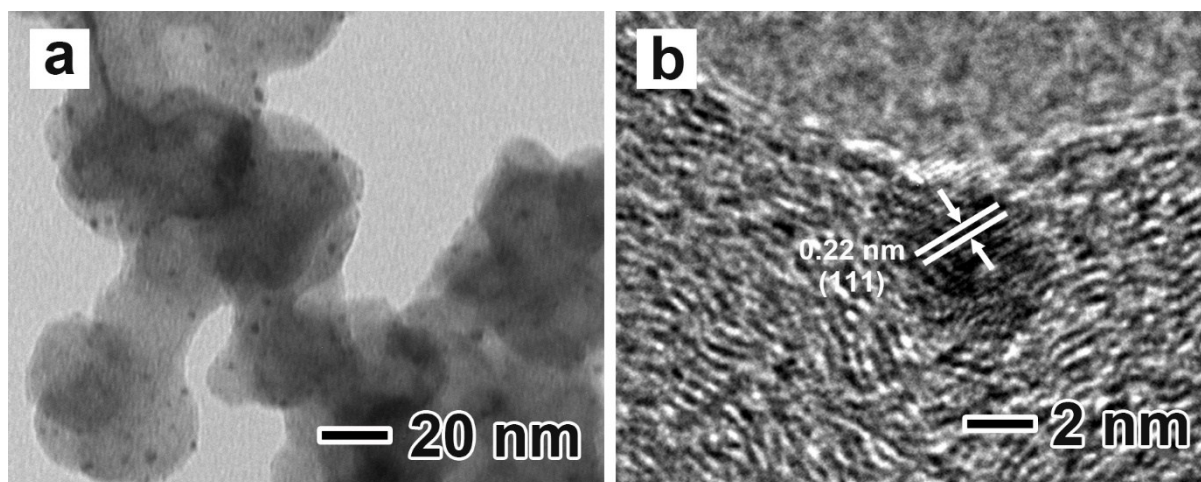

**Fig S5.** (a) TEM and (b) HRTEM images of the Rh/C catalysts prepared by dispersing the Rh nanoparticles on carbon black supports.

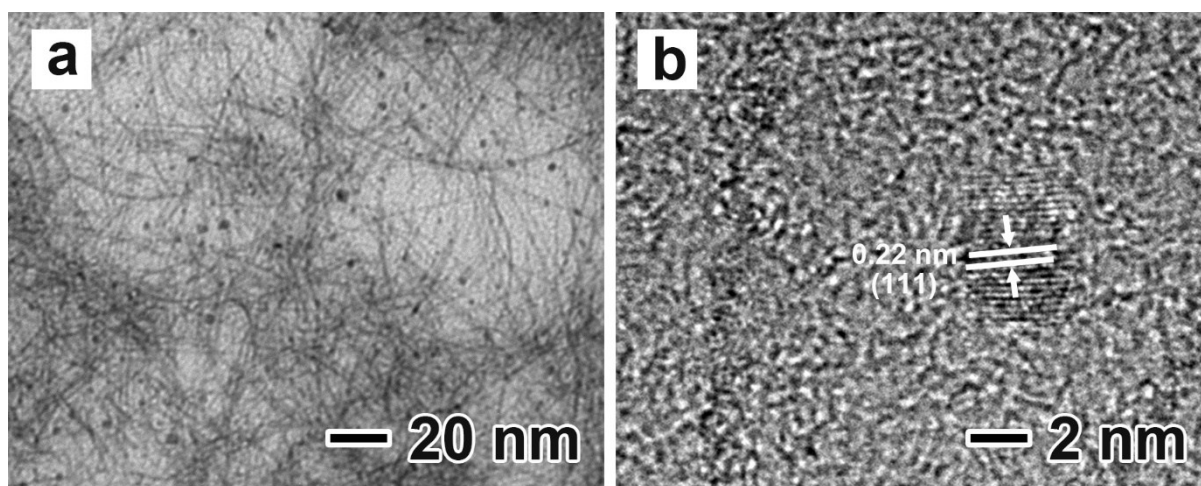

**Fig S6.** (a) TEM and (b) HRTEM images of the mixed Rh nanoparticles and  $\text{WO}_{3-x}$  nanowires ( $\text{Rh}+\text{WO}_{3-x}$ ).

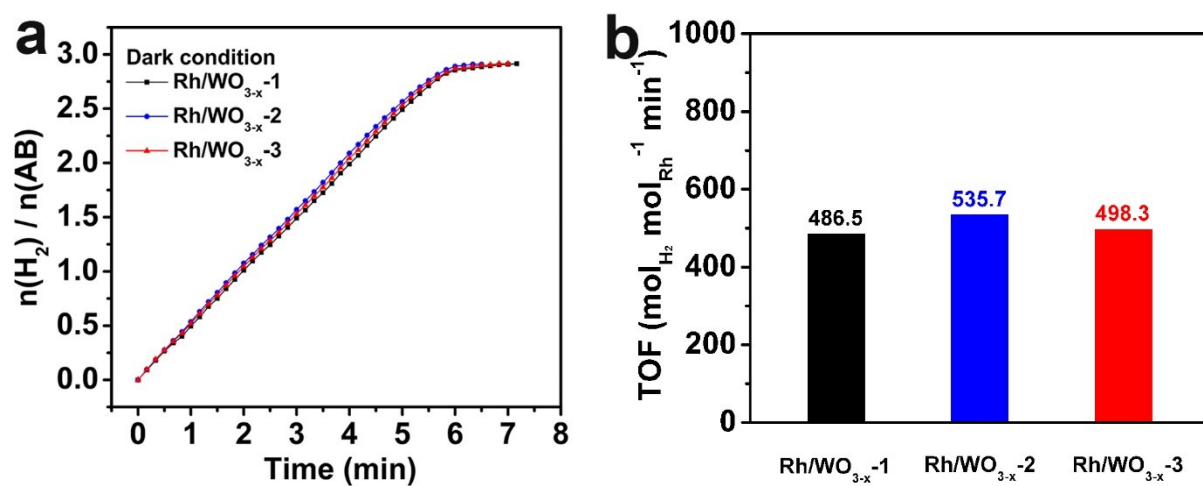

**Fig S7.** (a) Time courses for hydrogen production from AB over Rh/WO<sub>3-x</sub>-1, Rh/WO<sub>3-x</sub>-2, and Rh/WO<sub>3-x</sub>-3 catalysts and (b) their corresponding TOF values under dark condition.



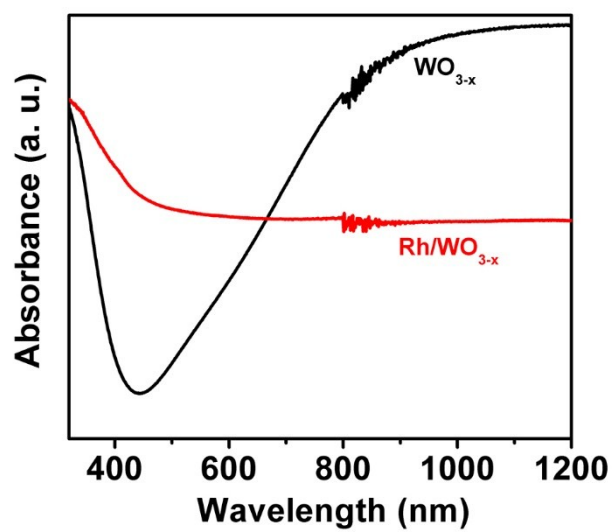

**Fig S8.** UV-Vis-NIR absorption spectra of Rh/WO<sub>3-x</sub> hybrid nanowires and WO<sub>3-x</sub> nanowires.

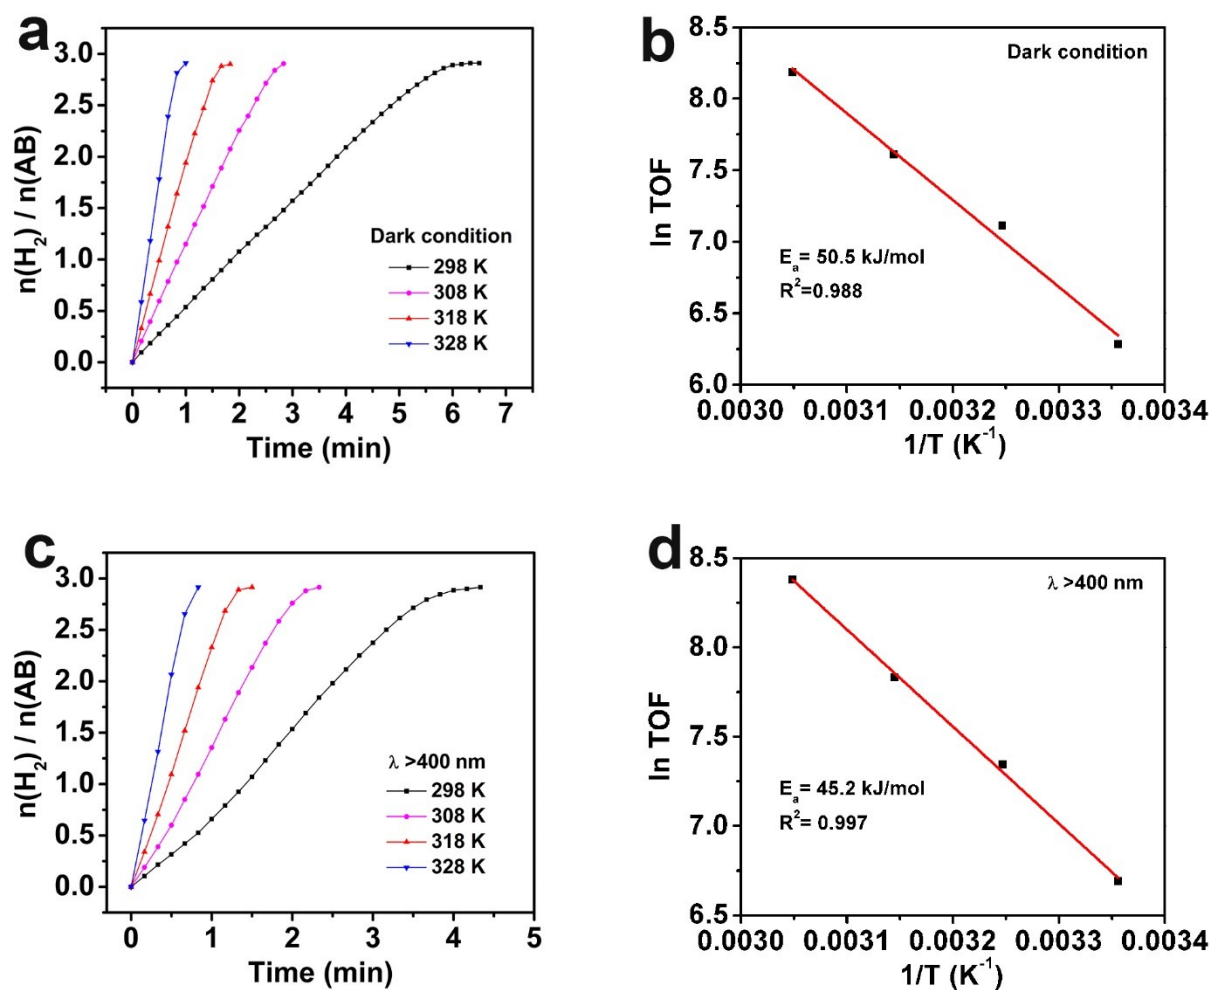

**Fig S9.** Plots of time versus volume of hydrogen generated from the hydrolysis of AB catalyzed by Rh/WO<sub>3-x</sub> and corresponding Arrhenius plots under (a, b) dark condition and (c, d) visible light irradiation at different temperatures in the range of 298–328 K, respectively.

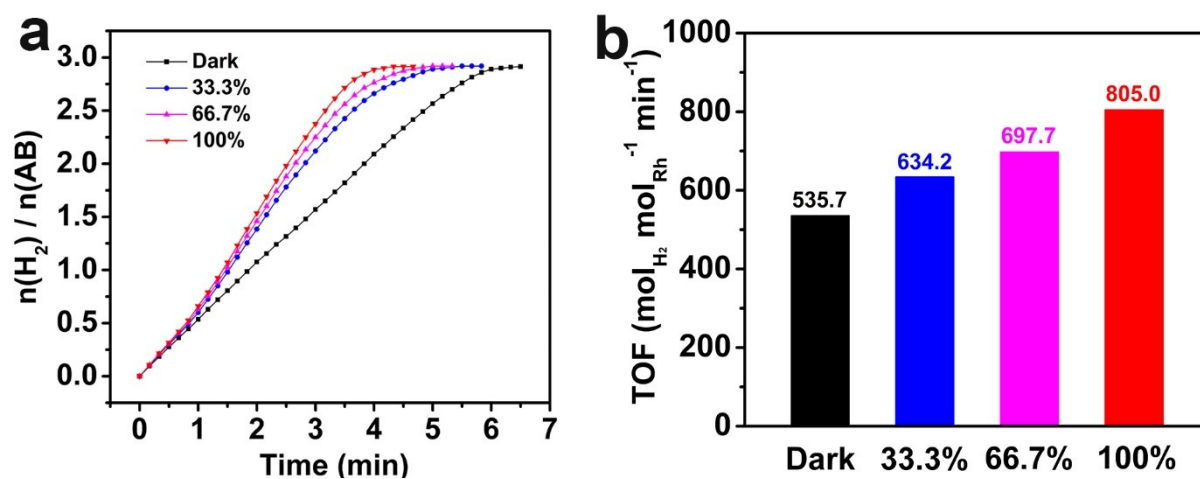

**Fig S10.** (a) Plots of time versus volume of hydrogen generated from the hydrolysis of AB catalyzed by Rh/WO<sub>3-x</sub> and (b) the corresponding TOF values under visible light irradiation with different powers of Xe lamp.

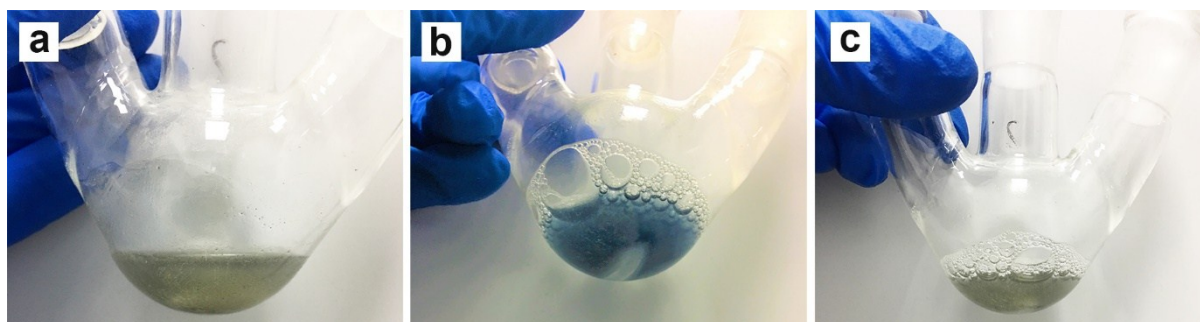

**Fig S11.** Digital photograph of Rh/WO<sub>3-x</sub> suspension under different conditions: (a) before catalytic reaction, (b) after catalytic reaction and the flask was kept sealed, (c) after catalytic reaction and the flask was exposed to the air for a little while.

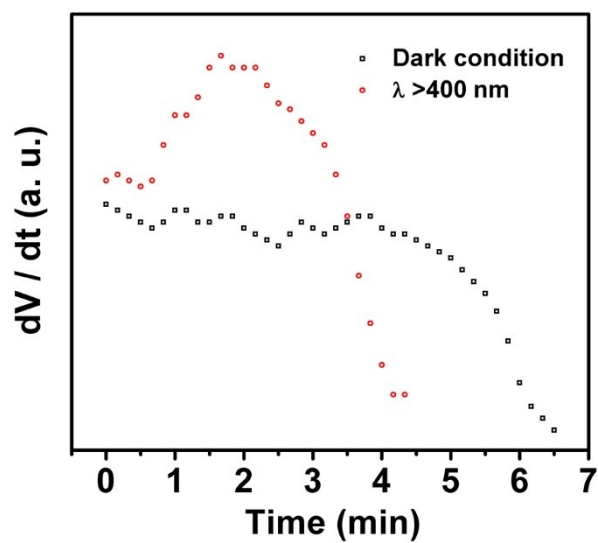

**Fig S12.** Plots of  $dV/dt$  vs.  $t$  by using Rh/WO<sub>3-x</sub> as the catalysts under dark condition and visible light irradiation, respectively. The  $dV/dt$  is the differential of H<sub>2</sub> production volume (V) to H<sub>2</sub> generation time (t).

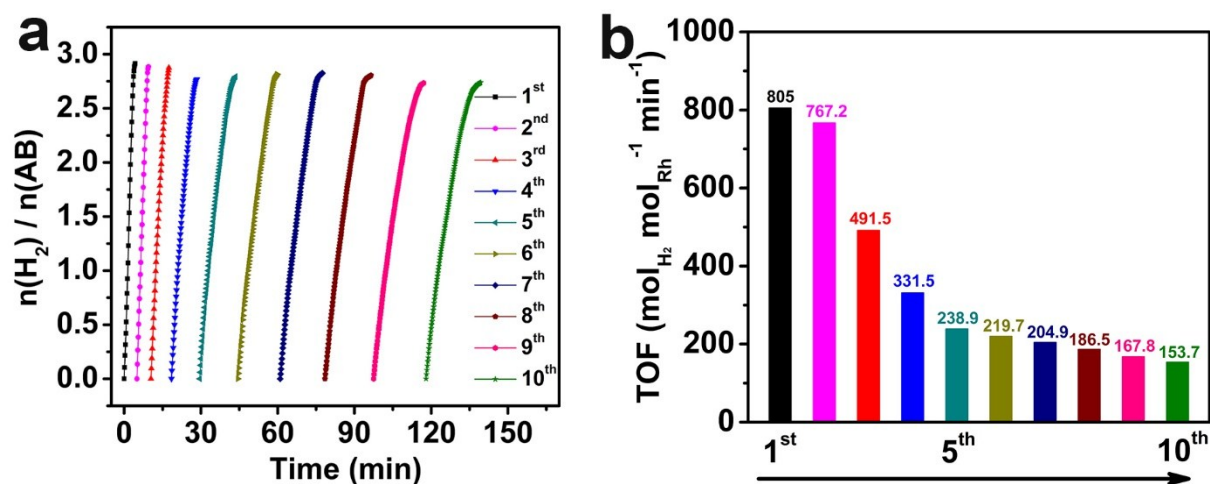

**Fig S13.** (a) Plots of time versus volume of hydrogen generated from the hydrolysis of AB catalyzed by Rh/WO<sub>3-x</sub> for ten cycles and (b) the corresponding TOF values.

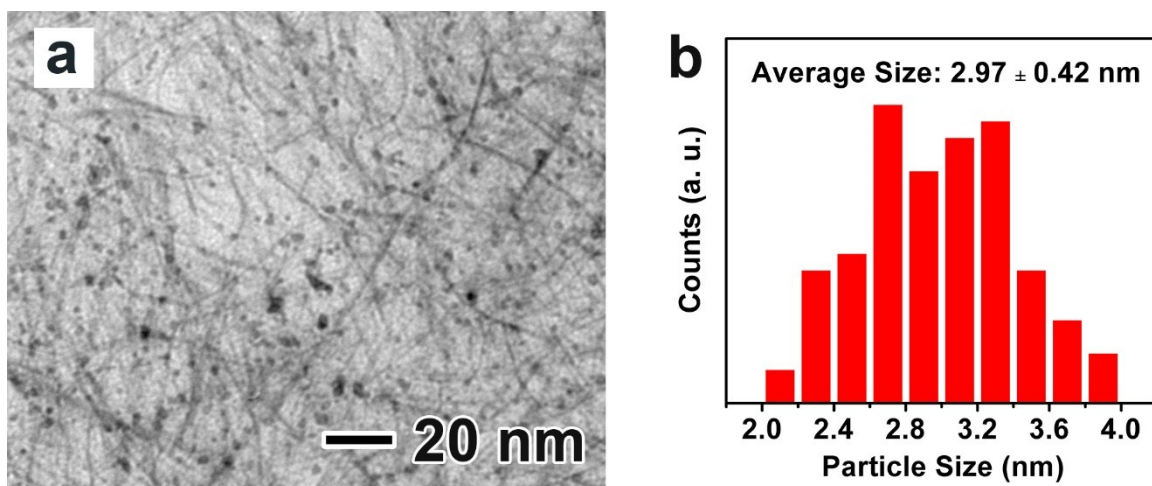

**Fig S14.** (a) TEM image and (b) size distribution of Rh nanoparticles of the Rh/WO<sub>3-x</sub> catalysts after the fifth cycle.

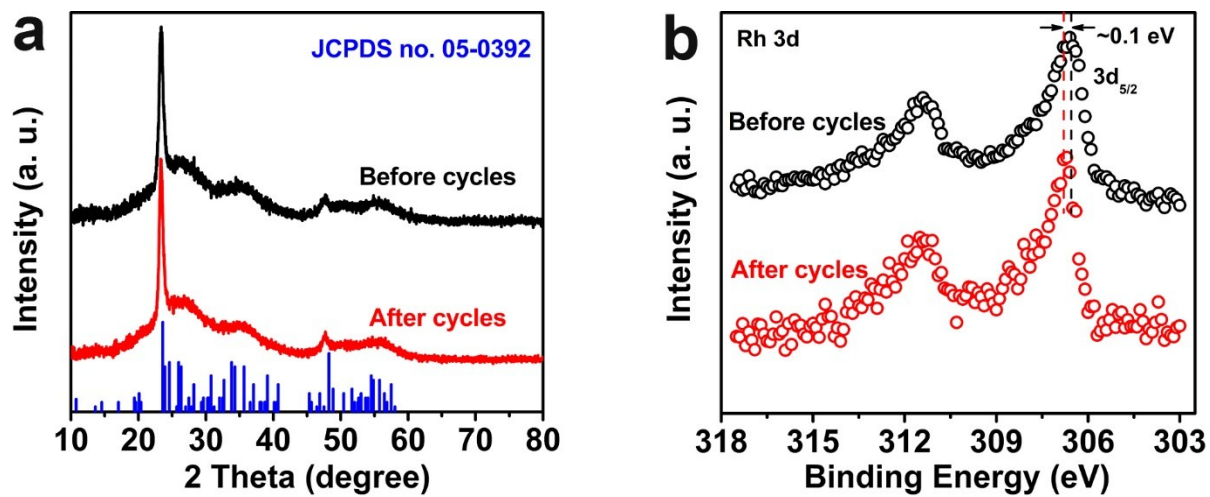

**Fig S15.** (a) XRD patterns and (b) XPS spectra for Rh 3d orbitals of the Rh/WO<sub>3-x</sub> catalysts before and after the fifth cycle.
